# Supplementary material for: Spatial and temporal variability in soil and vegetation carbon dynamics under experimental drought and soil amendments
Source: Copernicus journal article supplement (doi:10.5194/egusphere-2023-2673), 2023-11-29
Supplement: Supplementary file 1 [file egusphere-2023-2673-supplement.pdf]

# Supplements

## Guasconi et al. - Spatial and temporal variability in soil and vegetation carbon dynamics under experimental drought and soil amendments



Fig S1. Regression plot SOM ~ tot C in the study system.

Table T1. Details of the sampling design

|                                         | 2019                                                         | 2022                                                         |
|-----------------------------------------|--------------------------------------------------------------|--------------------------------------------------------------|
| Soil bulk density                       | 3 cores per site (12 cores in total)                         | 1 core per plot (48 cores in total)                          |
| Total C and N and $\delta^{13}\text{C}$ | 6 cores per site (24 cores in total)                         | 1 core per plot (48 cores in total)                          |
| pH                                      | 0-10 cm, 10-20 cm, 20-30 cm and 40-50 cm. All plots (n = 48) | 0-10 cm, 10-20 cm, 20-30 cm and 40-50 cm. All plots (n = 48) |
| P, Ca, Mg, K                            | 0-30 cm. All plots (n = 48)                                  | 10-20 cm. All plots (n = 48)                                 |
| Soil moisture                           | All plots (n = 48)                                           | All plots (n = 48)                                           |
| Root biomass                            | All plots (n = 48)                                           | All plots (n = 48)                                           |
| Aboveground biomass                     | All plots (n = 48)                                           | All plots (n = 48)                                           |

Table T2. Effect of the treatments, F and P values from the mixed linear model

| <b>variable</b>     |                       | <b>F-value</b> | <b>P-value</b> |
|---------------------|-----------------------|----------------|----------------|
| Tot C%              | compost               | 3.92           | 0.04           |
|                     | drought               | 0.11           | 0.74           |
|                     | depth                 | 381.34         | < 0.001        |
|                     | compost*drought       | 0.09           | 0.75           |
|                     | compost*depth         | 4.71           | 0.03           |
|                     | drought*depth         | 0.07           | 0.78           |
|                     | compost*drought*depth | 0.18           | 0.67           |
| Soil C stock        | compost               | 2.55           | 0.11           |
|                     | drought               | 0.02           | 0.88           |
|                     | depth                 | 318.82         | < 0.001        |
|                     | compost*drought       | 0.45           | 0.49           |
|                     | compost*depth         | 1.58           | 0.21           |
|                     | drought*depth         | 0.75           | 0.38           |
|                     | compost*drought*depth | 0.14           | 0.70           |
| Bulk Density        | compost               | 4.43           | 0.03           |
|                     | drought               | 0.53           | 0.46           |
|                     | depth                 | 133.90         | < 0.001        |
|                     | compost*drought       | 0.01           | 0.91           |
|                     | compost*depth         | 3.42           | 0.06           |
|                     | drought*depth         | 2.60           | 0.10           |
|                     | compost*drought*depth | 1.24           | 0.26           |
| Root biomass        | compost               | 0.01           | 0.97           |
|                     | drought               | 0.26           | 0.60           |
|                     | depth                 | 742.50         | < 0.001        |
|                     | compost*drought       | 0.28           | 0.59           |
|                     | compost*depth         | 0.03           | 0.84           |
|                     | drought*depth         | 0.01           | 0.97           |
|                     | compost*drought*depth | 0.51           | 0.47           |
| Root:shoot          | compost               | 0.26           | 0.60           |
|                     | drought               | 1.44           | 0.23           |
|                     | depth                 | 730.55         | < 0.001        |
|                     | compost*drought       | 0.54           | 0.46           |
|                     | compost*depth         | 0.04           | 0.84           |
|                     | drought*depth         | 0.01           | 0.93           |
|                     | compost*drought*depth | 0.20           | 0.65           |
| Aboveground biomass | compost               | 43.47          | < 0.001        |
|                     | drought               | 61.29          | < 0.001        |
|                     | compost*drought       | 32.77          | < 0.001        |

Table T3. Spatial variability, F and P values from the mixed linear model

| <b>variable</b>     |                     | <b>F-value</b> | <b>P-value</b> |
|---------------------|---------------------|----------------|----------------|
| Tot C%              | grassland           | 6.12           | 0.01           |
|                     | catenary position   | 88.07          | < 0.01         |
|                     | depth               | 1031.73        | < 0.01         |
|                     | grass*cat pos       | 43.19          | < 0.01         |
|                     | grass*depth         | 42.61          | < 0.01         |
|                     | cat pos*depth       | 2.44           | 0.12           |
|                     | grass*cat pos*depth | 3.85           | 0.04           |
| Soil C stock        | grassland           | 3.80           | 0.05           |
|                     | catenary position   | 59.62          | < 0.01         |
|                     | depth               | 697.73         | < 0.01         |
|                     | grass*cat pos       | 9.98           | < 0.01         |
|                     | grass*depth         | 44.45          | < 0.01         |
|                     | cat pos*depth       | 0.28           | 0.59           |
|                     | grass*cat pos*depth | 0.75           | 0.38           |
| Bulk Density        | grassland           | 5.82           | 0.01           |
|                     | catenary position   | 16.51          | < 0.01         |
|                     | depth               | 261.30         | < 0.01         |
|                     | grass*cat pos       | 44.24          | < 0.01         |
|                     | grass*depth         | 4.00           | 0.04           |
|                     | cat pos*depth       | 4.60           | 0.03           |
|                     | grass*cat pos*depth | 10.94          | < 0.01         |
| Root biomass        | grassland           | 0.72           | 0.39           |
|                     | catenary position   | 3.89           | 0.04           |
|                     | depth               | 581.87         | < 0.01         |
|                     | grass*cat pos       | 5.61           | 0.02           |
|                     | grass*depth         | 1.83           | 0.17           |
|                     | cat pos*depth       | 12.94          | < 0.01         |
|                     | grass*cat pos*depth | 0.04           | 0.83           |
| Root:shoot          | grassland           | 0.42           | 0.51           |
|                     | catenary position   | 3.96           | 0.04           |
|                     | depth               | 748.09         | < 0.01         |
|                     | grass*cat pos       | 1.26           | 0.26           |
|                     | grass*depth         | 2.60           | 0.11           |
|                     | cat pos*depth       | 12.17          | < 0.01         |
|                     | grass*cat pos*depth | 0.49           | 0.48           |
| Aboveground biomass | grassland           | 9.58           | < 0.01         |
|                     | catenary position   | 0.24           | 0.62           |
|                     | grass*cat pos       | 38.14          | < 0.01         |

Table T4. Temporal variability, F and P values from the mixed linear model

| <b>variable</b>     |            | <b>F-value</b> | <b>P-value</b> |
|---------------------|------------|----------------|----------------|
| Tot C%              | year       | 12.22          | < 0.01         |
|                     | depth      | 969.92         | < 0.01         |
|                     | year*depth | 0.79           | 0.37           |
| Soil C stock        | year       | 5.00           | 0.02           |
|                     | depth      | 659.01         | < 0.01         |
|                     | year*depth | 0.001          | 0.96           |
| Bulk Density        | year       | 6.83           | < 0.01         |
|                     | depth      | 254.08         | < 0.01         |
|                     | year*depth | 0.27           | 0.59           |
| Root biomass        | year       | 7.27           | < 0.01         |
|                     | depth      | 581.70         | < 0.01         |
|                     | year*depth | 9.13           | < 0.01         |
| Root:shoot          | year       | 22.62          | < 0.01         |
|                     | depth      | 575.76         | < 0.01         |
|                     | year*depth | 8.99           | < 0.01         |
| Aboveground biomass | year       | 102.75         | < 0.01         |
